# Supplementary material for: Metabolic and Bariatric Surgery Utilization Trends in the United States: Evidence From 2012 to 2021 National Electronic Medical Records Network
Source: PubMed Central journal article supplement (PMC10735086; doi:10.1097/as9.0000000000000317), 2023-12-04
Supplement: as9-4-e317-s001.pdf [file as9-4-e317-s001.pdf]

# Metabolic and Bariatric Surgery Utilization Trends in the United States: Evidence from 2012–2021 National Electronic Medical Records Network

## Appendices

Table 1. Diagnosis and Procedure Codes for Bariatric Surgery and Obesity

| Variable                                                                                                | Codes                                                                                                                                                       |
|---------------------------------------------------------------------------------------------------------|-------------------------------------------------------------------------------------------------------------------------------------------------------------|
| Open Roux-en-Y gastric bypass (RYGB)                                                                    | CPT-4: 43846, 43847<br>ICD-9-CM: 44.31, 44.39<br>ICD-10: 0D16078,                                                                                           |
| Laparoscopic Roux-en-Y gastric bypass (RYGB)                                                            | CPT-4: 43644, 43645<br>ICD-9-CM: 44.38<br>ICD-10: 0D16479, 0D1647A, 0D164J9, 0D164JA, 0D164K9, 0D164KA, 0D164Z9, 0D164ZA, 0D164ZB                           |
| Open Sleeve gastrectomy (SG)                                                                            | CPT: 43843,<br>ICD-9-CM: 43.89, 44.69<br>ICD-10: 0DQ60ZZ                                                                                                    |
| Laparoscopic Sleeve gastrectomy (SG)                                                                    | CPT: 43775<br>ICD-9-CM: 43.82<br>ICD-10: 0DB64Z3                                                                                                            |
| Laparoscopic adjustable gastric band (AGB)                                                              | CPT-4: 43770, S2082<br>ICD-9: 44.95<br>ICD-10: 0DV64CZ                                                                                                      |
| Laparoscopic single anastomosis duodenal-ileal bypass with sleeve (SADI-S)                              | CPT-4:* 43999                                                                                                                                               |
| Biliopancreatic Diversion with Duodenal Switch (BPD/DS) or Gastric Reduction Duodenal Switch (BPD/GRDS) | CPT-4: 43845, (without Duodenal Switch)<br>ICD-9-CM: 45.91, 45.51, 43.89<br>ICD-10: 0D190Z9, 0DB60ZZ, 0DB80ZZ                                               |
| Open Vertical-banded gastroplasty (VGB)                                                                 | CPT: 43842 “Vertical-banded gastroplasty, not performed anymore”, VGB procedures are essentially no longer performed.<br>ICD-9-CM: 44.68<br>ICD-10: 0DQ64ZZ |
| Obesity                                                                                                 | ICD-9-CM: 278.0x, 278.01, V77.8, V85.41, V85.42, V85.43, V85.44, V85.45,<br>ICD-10: E66.xx, Z68.4x                                                          |
| Morbid obesity                                                                                          | ICD-9: 278.01<br>ICD-10: E66.01                                                                                                                             |

CPT-4, Current Procedure Terminology (American Medical Association, Chicago, IL),  
ICD-9-CM, International Classification of Diseases, Ninth Revision, Clinical Modification,  
ICD-10-CM, International Classification of Diseases, Tenth Revision, Clinical Modification.

\* Currently, there is no specific CPT code that describes the SADI bariatric surgery procedure. However, some surgeons may use an unlisted CPT code such as 43999 (Unlisted procedure, digestive system) to report the procedure.

Table 2. Procedure Codes Used to Identify Open and Laparoscopic Revisional Bariatric Surgery

| <b>Description</b>                                                                                                                                          | <b>Code</b> | <b>Code Type</b> |
|-------------------------------------------------------------------------------------------------------------------------------------------------------------|-------------|------------------|
| Laparoscopy, surgical, gastric restrictive procedure; removal of adjustable gastric restrictive device component only                                       | 43772       | CPT-4            |
| Revision of gastrojejunal anastomosis (gastrojejunostomy) with reconstruction, with or without partial gastrectomy or intestine resection; with vagotomy    | 43865       | CPT-4            |
| Revision of gastroduodenal anastomosis (gastroduodenostomy) with reconstruction; without vagotomy                                                           | 43850       | CPT-4            |
| Revision of gastroduodenal anastomosis (gastroduodenostomy) with reconstruction; with vagotomy                                                              | 43855       | CPT-4            |
| Laparoscopy, surgical, gastric restrictive procedure; revision of adjustable gastric restrictive device component only                                      | 43771       | CPT-4            |
| Laparoscopy, surgical, gastric restrictive procedure; removal and replacement of adjustable gastric restrictive device component only                       | 43773       | CPT-4            |
| Revision of gastrojejunal anastomosis (gastrojejunostomy) with reconstruction, with or without partial gastrectomy or intestine resection; without vagotomy | 43860       | CPT-4            |
| Revision, open, of gastric restrictive procedure for morbid obesity, other than adjustable gastric restrictive device (separate procedure)                  | 43848       | CPT-4            |
| Laparoscopy, surgical, gastric restrictive procedure; removal of adjustable gastric restrictive device and subcutaneous port components                     | 43774       | CPT-4            |
| Gastric restrictive procedure, open; removal of subcutaneous port component only                                                                            | 43887       | CPT-4            |
| Gastric restrictive procedure, open; revision of subcutaneous port component only                                                                           | 43886       | CPT-4            |
| Gastric restrictive procedure, open; removal and replacement of subcutaneous port component only                                                            | 43888       | CPT-4            |
| Laparoscopic removal of gastric restrictive device(s)                                                                                                       | 44.97       | ICD-9            |
| Laparoscopic revision of gastric restrictive procedure                                                                                                      | 44.96       | ICD-9            |
| Open revision of RYGB                                                                                                                                       | 44.5        | ICD-9            |
